# Supplementary material for: ADAPT, a Novel Scaffold Protein-Based Probe for Radionuclide Imaging of Molecular Targets That Are Expressed in Disseminated Cancers
Source: Oxford University Press journal article supplement (doi:10.1158/0008-5472.can-14-3497), 2015-08-21
Supplement: 00085472can143497-sup-141672_3_supp_0_nt39h1.docx [file 00085472can143497-sup-141672_3_supp_0_nt39h1.docx]

**Table S1. Affinity constants of DOTA-C-(HE)3-ADAPT6 and H6-ADAPT6.** Data were fitted to a 1:1 Langmuir binding isotherm and values are represented as mean values (± SD) from the number of replicates indicated within brackets.

|  | HER2 | | | HSA | | |
| --- | --- | --- | --- | --- | --- | --- |
|  | ka(M-1s-1) | kd(s-1) | KD (nM) | ka(M-1s-1) | kd(s-1) | KD (nM) |
| DOTA-C-(HE)3-ADAPT6 | 2.0(±0.3)×105 | 5.0(±0.4)×10-4 | 2.5 (5) | - | - | - |
| H6-ADAPT6 | 2.7(±0.6)×105 | 3.3(±0.1)×10-4 | 1.3 (10) | - | - | - |
